# Supplementary material for: Fast synthesis of submicron aluminosilicate (low silica/alumina ratio) zeolites under solventless microwave radiation
Source: Royal Society of Chemistry journal article supplement (doi:10.1039/c5ra17625e), 2015-01-01
Supplement: c5ra17625e1.pdf [file c5ra17625e1.pdf]

## Electronic Supplementary Information

### **Fast synthesis of submicron aluminosilicate (low silica/alumina ratio) zeolites under solventless microwave radiation**

Shangjing Zeng, Runwei Wang\*, Yongcun Zou, Jingru Fu, Zhongtao Zhang, Shilun Qiu\*

College of Chemistry and State Key Laboratory of Inorganic Synthesis and Preparative Chemistry, Jilin University, Changchun 130012, China

Corresponding author. E-mail: rwwang@jlu.edu.cn; sqiu@jlu.edu.cn

## **Experiment**

### **Materials**

$\text{Na}_2\text{SiO}_3 \cdot 9\text{H}_2\text{O}$  ( $\text{SiO}_2$ , ca.20 wt. %, Tianjin Guangfu Chemical Reagent Co., Ltd.),  $\text{NH}_4\text{Cl}$  (Tianjin Fuchen Chemical Reagent Co.Ltd.), pseudoboehmite ( $\text{Al}_2\text{O}_3$ , ca.70 wt.%,  $\text{H}_2\text{O}$ , 30 wt.%, Liaoning hydratight science and technology development Co., Ltd.).

### **Synthesis**

Microwave equipment used in the experiment is a modified household type microwave oven (add a thermal-couple inside the cavity which can monitor the reaction temperature) with a working frequency of 2.45 GHz (Midea MM720KG1-PW) and an output power ranges from 70 to a maximum of 700 W. Particularly wish to point out that this work is in line with my university safety policy on modifying equipment of this time.

Microwave solventless synthesis of MS-NaX.

As a typical run, 3.7-5 g  $\text{Na}_2\text{SiO}_3 \cdot 9\text{H}_2\text{O}$  was mixed with 0.34 g pseudoboehmite. After grinding for 5 min, followed by adding of 0.3 g  $\text{NH}_4\text{Cl}$ . After grinding for 10 min, the mixture was

transferred to a glass vial and sealed with a rubber stopper with a tiny hole to balance atmospheric pressure in the experiments. Then the glass vial was exposed to the electromagnetic field with the 10 % maximum power (Equivalent to 70 w) for 60 min, the thermal-couple demonstrate that the reaction temperate maintained at 110 °C or so. The resulting products were filtered and washed with distilled water and dried at 60°C overnight. The obtained products were designated as MS-NaX-T<sub>min</sub>, where T stands for crystallization time.

Hydrothermal synthesis of NaX samples.

The conventional NaX samples were hydrothermally synthesized from the aluminosilicate gels with molar ratio of 6.6Na<sub>2</sub>O/3.8SiO<sub>2</sub>/1Al<sub>2</sub>O<sub>3</sub>/254H<sub>2</sub>O. As a typical run for the synthesis of NaX, 12g of Na<sub>2</sub>SiO<sub>3</sub>·9H<sub>2</sub>O was dissolved in 30mL of H<sub>2</sub>O, after stirring for 10 min at room temperature, a solution containing 1.3g of NaAlO<sub>2</sub>, 1.8g of NaOH, and 13mL of H<sub>2</sub>O was introduced into the mixture of preformed sodium silicate solution. After stirring for 30 min, the aluminosilicate gels were transferred into steel-stainless autoclave and crystallized at 100°C for 5 h, The resulting products were filtered and washed with distilled water and dried at 60°C overnight.

Microwave solventless synthesis of MS-NaA.

As a typical run, 3.2 g Na<sub>2</sub>SiO<sub>3</sub>·9H<sub>2</sub>O was mixed with 0.34 g pseudoboehmite. After grinding for 5 min, followed by adding of 0.05 g NH<sub>4</sub>Cl. After grinding for 10 min, the mixture was transferred to a glass vial and sealed with a rubber stopper with a tiny hole to balance atmospheric pressure experiments. Then the glass vial was exposed to the electromagnetic field with the 10 % maximum power (Equivalent to 70 w) for 40 min. The resulting products were filtered and washed with water and dried at 60°C overnight. The obtained products were designated as MS-NaA.

Microwave solventless synthesis of MS-SOD.

As a typical run, 2.9 g Na<sub>2</sub>SiO<sub>3</sub>·9H<sub>2</sub>O was mixed with 0.34 g pseudoboehmite. After grinding for 10 min, the mixture was transferred to a glass vial and sealed with a rubber stopper with a tiny hole to balance atmospheric pressure experiments. Then the glass vial was exposed to the electromagnetic field with the 10 % maximum powe (Equivalent to 70 w) for 40 min. The resulting products were filtered and washed with water and dried at 60°C overnight. The obtained products were designated as MS-SOD.

Microwave solventless synthesis of MS-NaA/X.

As a typical run, 3.2-3.6 g Na<sub>2</sub>SiO<sub>3</sub>·9H<sub>2</sub>O was mixed with 0.34 g pseudoboehmite. After grinding for 5 min, followed by adding of 0-0.34 g NH<sub>4</sub>Cl. After grinding for 10 min, the mixture was transferred to a glass vial and sealed with a rubber stopper with a tiny hole to balance atmospheric pressure experiments. Then the glass vial was exposed to the electromagnetic field with the 10 % maximum power fo (Equivalent to 70 w) 40 min. The resulting products were filtered and washed with water and dried at 60°C overnight. The obtained products were designated as MS-NaA/X-M, where T stands for the proportion of NaA.

## Characterization

X-ray diffraction (XRD) patterns were measured with a Rigaku D/MAX 2550 diffractometer with Cu K $\alpha$  radiation. Scanning electron microscopy (SEM) images were collected by JEOL electron microscopes (FE-JSM 6700, Japan). The nitrogen isotherms at -196 °C were measured using a Micromeritics ASAP 2020M system. <sup>29</sup>Si MAS NMR spectra were recorded on a Varian Infinity Plus 400 spectrometer, and chemical shifts were referenced to tetramethylsilane (TMS). The concentration of Ca<sup>2+</sup> in the solution was determined by inductively coupled plasma (ICP) with a Perkin-Elmer plasma 40 emission spectrometer.

Calcium ion-exchange rate.

The Ca<sup>2+</sup> exchange kinetics of zeolite were monitored by sodium ion selective electrodes on a PXSJ-216 (Shanghai Precision & Scientific Instrument Co., Ltd.)

In the exchange procedure, 100 ml of a 0.8 mmol L<sup>-1</sup> CaCl<sub>2</sub> solution was added in a beaker, followed by the addition of 0.06 g of respective hydrated zeolite (dried at 60°C overnight). The concentration of sodium ion in the solution was measured at various time with stirring. The zeolite was removed immediately by centrifugation after reaction at 15 min. The calcium concentration of supernatant determined by inductively coupled plasma (ICP) with a Perkin-Elmer plasma 40 emission spectrometer.

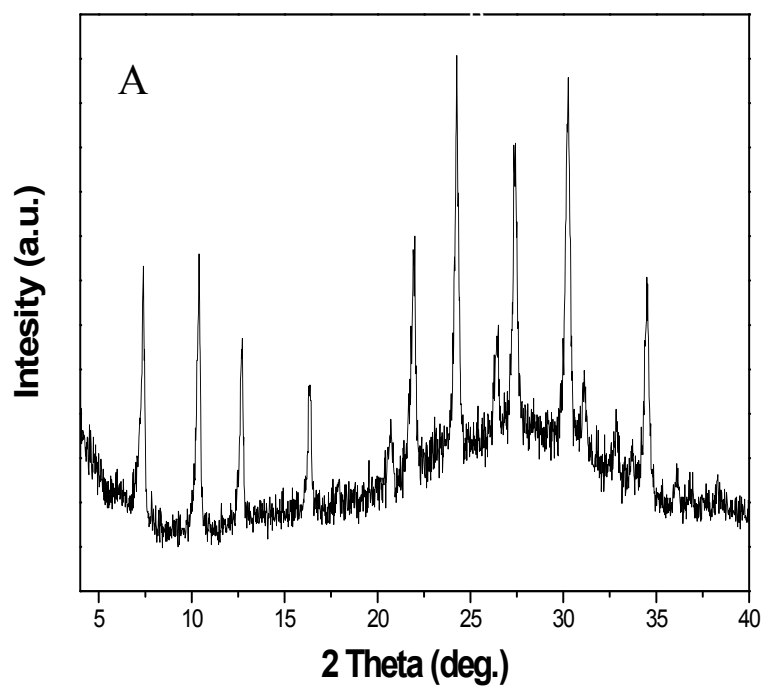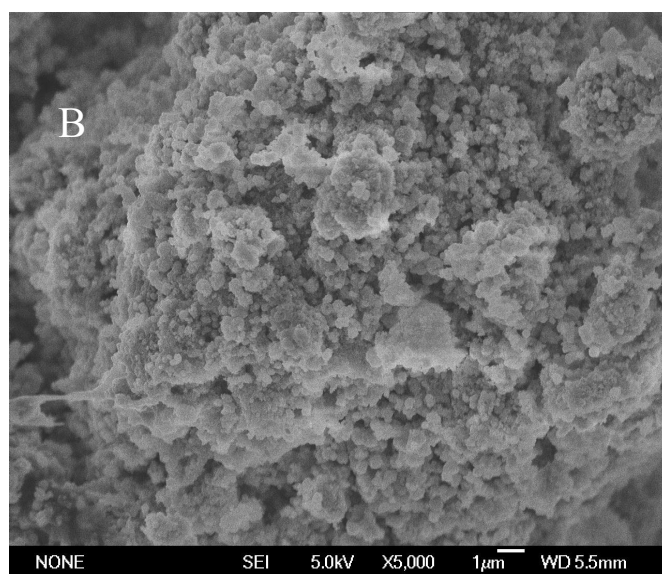

**Fig. S1.** The XRD pattern (A) and SEM image (B) of the MS-NaA

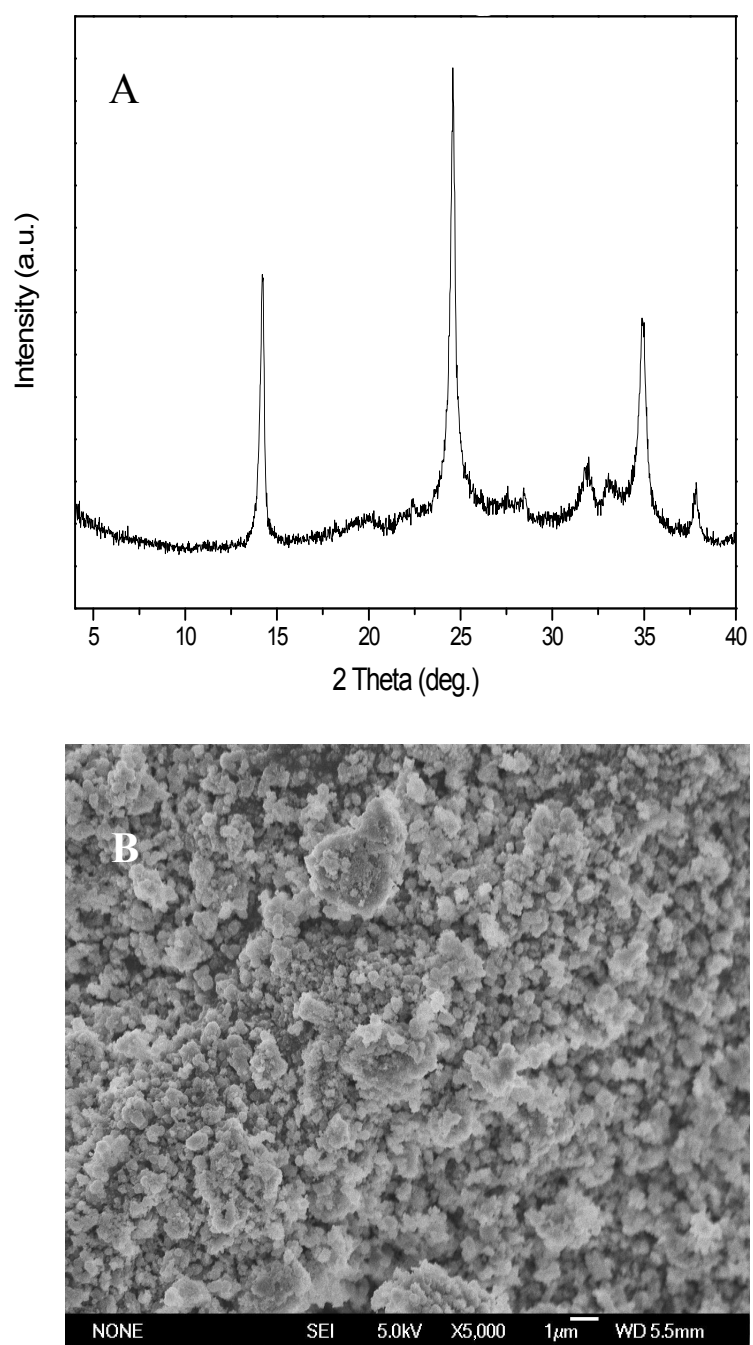

**Fig. S2.** The XRD pattern (A) and SEM image (B) of the MS-SOD

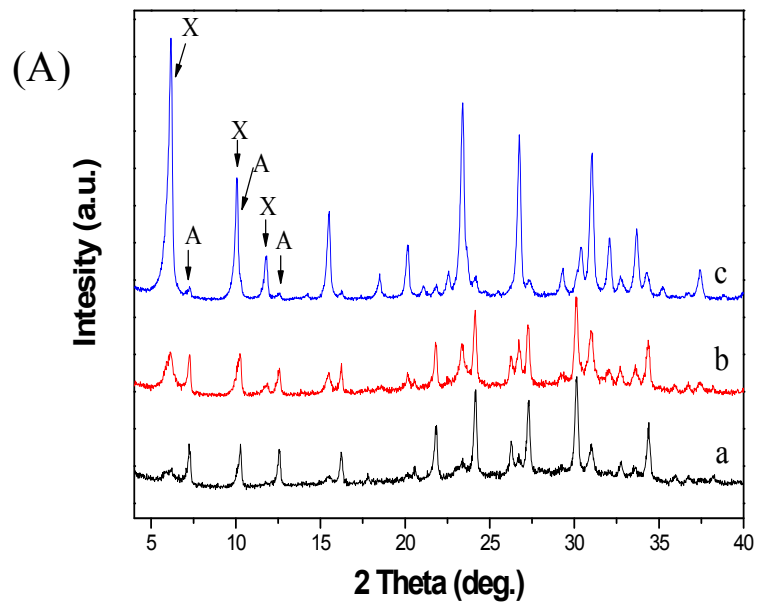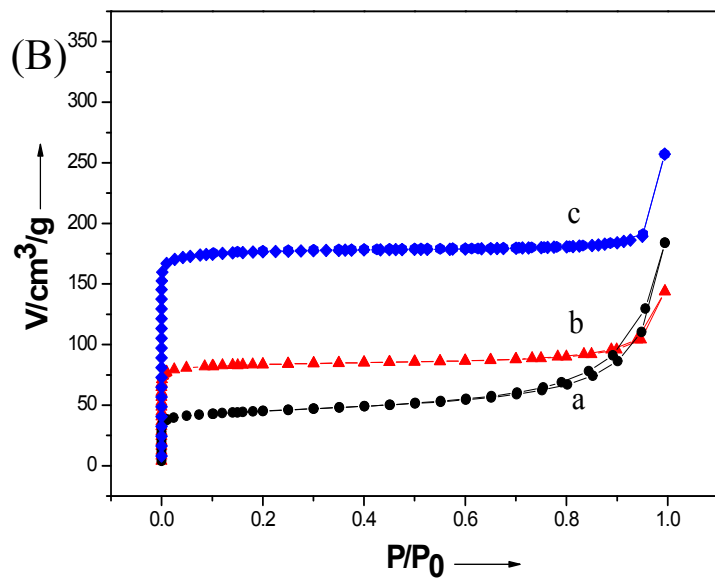

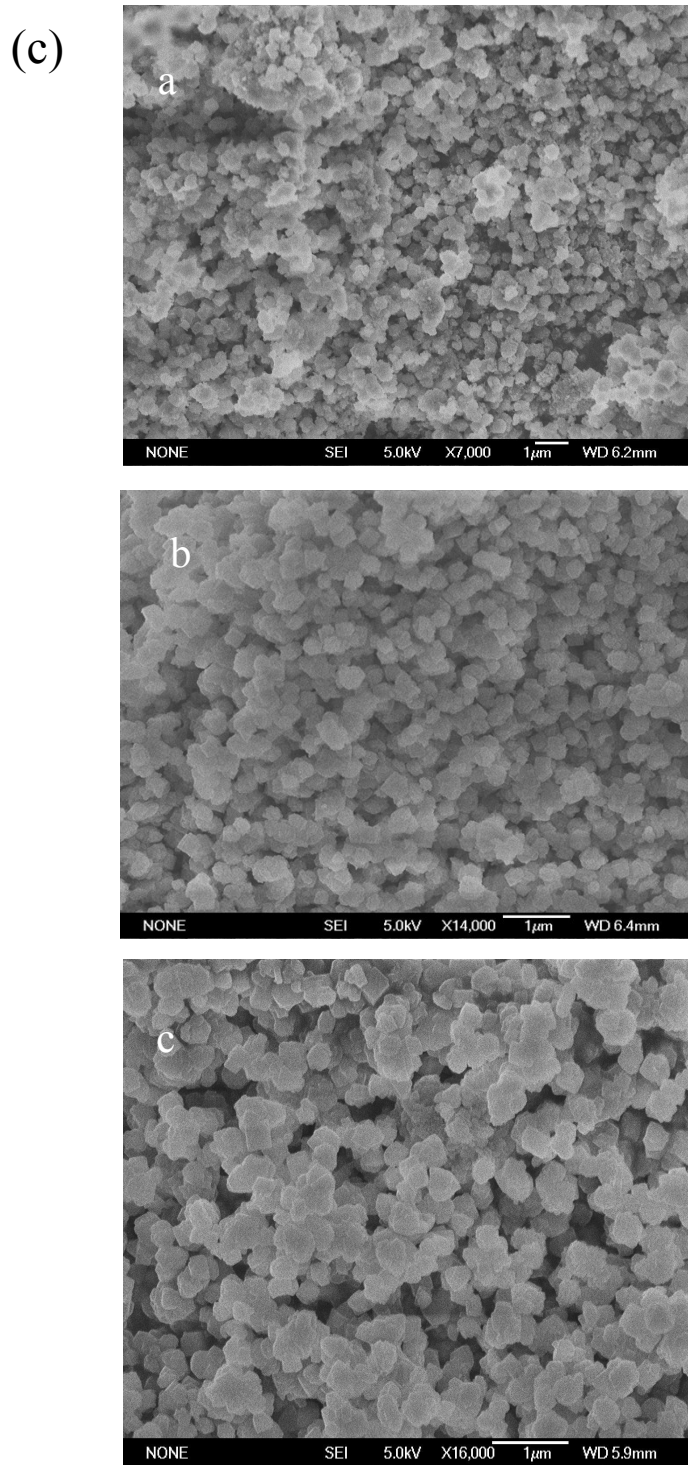

**Fig. S3.** XRD patterns (A), N<sub>2</sub> sorption curves (B) and SEM images (C) of samples, MS-NaA/X-83 (a), MS-NaA/X-41 (b) and MS-NaA/X-5 (c)

**Table S1.** Physical characteristics of MS-NaA/X, MS-NaX and NaX zeolites

|                          | $S_{\text{BET}}$ (m <sup>2</sup> /g) | $S_{\text{Mic}}^{\text{a}}$ [m <sup>2</sup> /g] | $S_{\text{ext}}^{\text{a}}$ [m <sup>2</sup> /g] | $V_{\text{total}}^{\text{b}}$ [m <sup>3</sup> /g] | $V_{\text{mic}}^{\text{a}}$ [m <sup>3</sup> /g] |
|--------------------------|--------------------------------------|-------------------------------------------------|-------------------------------------------------|---------------------------------------------------|-------------------------------------------------|
| MSA/X-83                 | 152                                  | 101                                             | 50                                              | 0.28                                              | 0.05                                            |
| MSA/X-41                 | 275                                  | 246                                             | 28                                              | 0.22                                              | 0.12                                            |
| MSA/X-5                  | 581                                  | 544                                             | 37                                              | 0.40                                              | 0.26                                            |
| MS-NaX-20 <sub>min</sub> | 85                                   | 17                                              | 68                                              | 0.38                                              | 0                                               |
| MS-NaX-45 <sub>min</sub> | 283                                  | 195                                             | 88                                              | 0.43                                              | 0.11                                            |
| MS-NaX-60 <sub>min</sub> | 542                                  | 475                                             | 67                                              | 0.46                                              | 0.22                                            |
| NaX <sup>c</sup>         | 565                                  | 554                                             | 11                                              | -                                                 | 0.27                                            |

a  $V_{\text{total}}$ ,  $S_{\text{ext}}$  and  $V_{\text{mic}}$  were calculated by applying the t-plot method.

b  $V_{\text{total}}$  calculated from adsorption branch at ( $P/P_0=0.99$ ).

c NaX zeolite synthesized from hydrothermal route.

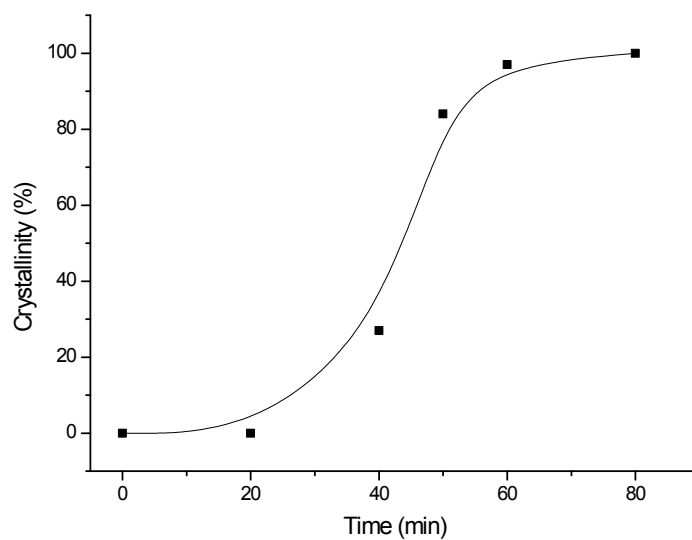

**Fig. S4.** Crystallization curve

The crystallinity is based on its peak intensity at 23.4° in XRD patterns, and conventional NaX prepared by hydrothermal method was designated as 100 % crystallinity.



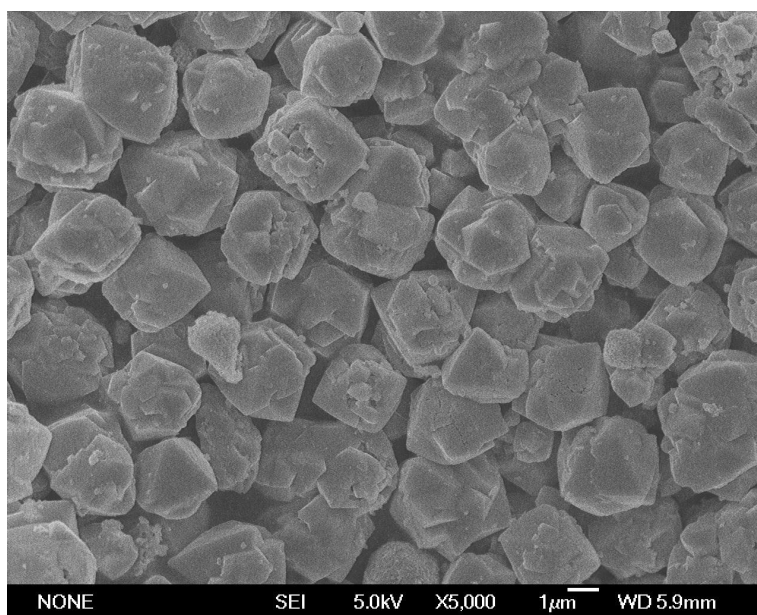

**Fig. S5.** SEM image of NaX synthesized from hydrothermal route.
